# Supplementary material
Source: PubMed Central journal article supplement (PMC1829389)
Supplement: 7601631s1.pdf [file 7601631s1.pdf]

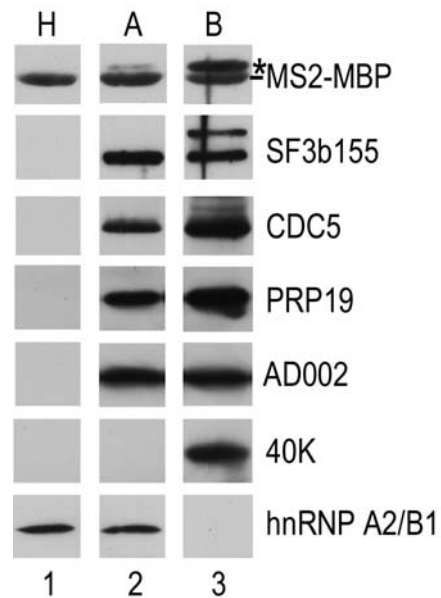

**Figure S1. hPrp19/CDC5 complex proteins are not present in H complexes.** A, B and H complexes were isolated from untreated HeLa nuclear extract by MS2 affinity selection as described in the Material and Methods, except that splicing was performed for 8 min at 30°C for formation of A and B complexes, and at 4°C for formation of H complexes. Purified complexes were fractionated on a 10-30% glycerol gradient. Proteins from equimolar amounts of H (lane 1), A (lane 2) or B (lane 3) complex were recovered, separated by SDS-PAGE and immunoblotting was performed with antibodies against the proteins indicated on the right. The MBP and hnRNP A2/B1 antibodies were obtained from abcam, UK. \* residual amounts of PRP19 remaining after stripping. Similar results were also obtained with H and A complexes isolated from U4/U6-depleted extract.
