# Supplementary material
Source: PubMed Central journal article supplement (PMC1829389)
Supplement: 7601631s2.pdf [file 7601631s2.pdf]

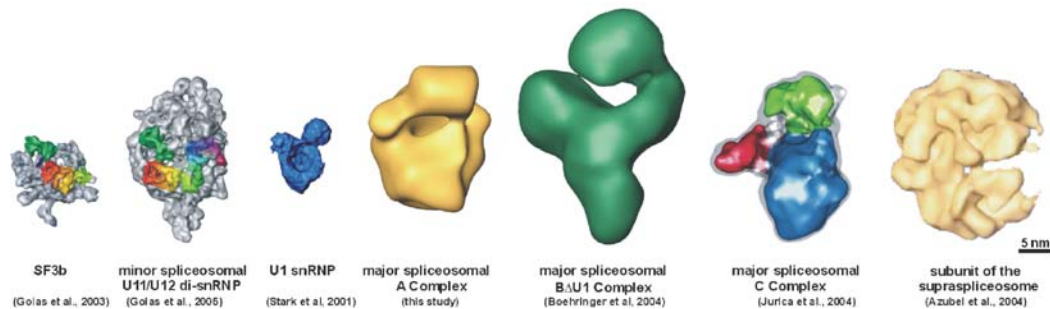

**Figure S2. Comparison of the structure of snRNPs and spliceosomal complexes at various assembly stages.** The relative orientation of the spliceosomal complexes is unknown (except for SF3b and the U11/U12 di-snRNP) due to the lack of labeling studies and/or limited resolution.

- Azubel M, Wolf SG, Sperling J, Sperling R (2004) Three-dimensional structure of the native spliceosome by cryo-electron microscopy. *Mol Cell* **15**: 833-839
- Boehringer D, Makarov EM, Sander B, Makarova OV, Kastner B, Lührmann R, Stark H (2004) Three-dimensional structure of a pre-catalytic human spliceosomal complex B. *Nat Struct Mol Biol* **11**: 463-468
- Golas MM, Sander B, Will CL, Lührmann R, Stark H (2003) Molecular Architecture of the Multiprotein Splicing Factor SF3b. *Science* **300**: 980-984
- Golas MM, Sander B, Will CL, Lührmann R, Stark H (2005) Major conformational change in the complex SF3b upon integration into the spliceosomal U11/U12 di-snRNP as revealed by electron cryomicroscopy. *Mol Cell* **17**: 869-883
- Jurica MS, Sousa D, Moore MJ, Grigorieff N (2004) Three-dimensional structure of C complex spliceosomes by electron microscopy. *Nat Struct Mol Biol* **11**: 265-269
- Stark H, Dube P, Lührmann R, Kastner B (2001) Arrangement of RNA and proteins in the spliceosomal U1 small nuclear ribonucleoprotein particle. *Nature* **409**: 539-42
